# Supplementary material
Source: Springer Nature journal article supplement (https://www.springermedizin.de/resource/supplementary/13023_2013_751_MOESM1_ESM.pdf/9642986)
Supplement: MOESM1 [file 9642986]

- 1- **CATK-E234F** 5'-TTCTCTTCCTCATAAAGCCTAG-3'
- 2- **CATK-E234R** 5'-TCACCTCAAGAACAAAGCAGCAG-3'
- 3- **CATK-E5F** 5'-TCAGGCAGGTAGAGAGAAGATATAG-3'
- 4- **CATK-E5R** 5'-AAGCAGGATAGGATAACAGA-3'
- 5- **CATK-E67F** 5'-ACTGCTGCCTCTGTTAGTTCACTG-3'
- 6- **CATK-E67R** 5'-AAGATAGAAGTGAGAACTCTGAG-3'
- 7- **CATK-E8F** 5'-ATCAGTACCTCGCACAAATACTC-3'
- 8- **CATK-E8R** 5'-ATCTCAGTATCACCACATCTGC-3'
